# Supplementary material for: Improved crystal orientation and physical properties from single-shot XFEL stills
Source: PubMed Central journal article supplement (PMC4257623; doi:10.1107/s1399004714024134), 2014-11-28
Supplement: d-70-03299-sup1.pdf [file d-70-03299-sup1.pdf]

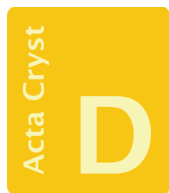

BIOLOGICAL  
CRYSTALLOGRAPHY

**Volume 70 (2014)**

**Supporting information for article:**

**Improved crystal orientation and physical properties from single-shot XFEL stills**

**Nicholas K. Sauter, Johan Hattne, Aaron S. Brewster, Nathaniel Echols, Petrus H. Zwart and Paul D. Adams**

## Appendix A. Partial derivatives of $\Delta\psi$ .

Here, we present partial derivatives of  $\Delta\psi$  with respect to the experimental quantities (beam direction, wavelength, and crystal orientation matrix), necessary for parameter optimization with target expression (2).

### A.1 Partial derivatives with respect to $\hat{\mathbf{s}}_0$

For the data presented in Table 1 the direction of the incident beam is exactly known ( $\hat{\mathbf{s}}_0 = -\hat{\mathbf{z}}$ ). However, it may be necessary to refine the  $\hat{\mathbf{s}}_0$  model for some experimental situations, so the method is presented here. We assume that  $\hat{\mathbf{s}}_0$  is expressed as a function of parameters  $p_i$  with known partial derivatives  $\partial\hat{\mathbf{s}}_0/\partial p_i$ . Then based on equations (4) to (12) we have:

$$\frac{\partial \mathbf{q}}{\partial p_i} = 0, \quad (\text{A.1})$$

$$\frac{\partial \hat{\mathbf{q}}_0}{\partial p_i} = 0, \quad (\text{A.2})$$

$$\frac{\partial \hat{\mathbf{e}}_1}{\partial p_i} = \hat{\mathbf{q}}_0 \times \frac{\partial \hat{\mathbf{s}}_0}{\partial p_i}, \quad (\text{A.3})$$

$$\frac{\partial \hat{\mathbf{c}}_0}{\partial p_i} = \frac{\partial \hat{\mathbf{s}}_0}{\partial p_i} \times \hat{\mathbf{e}}_1 + \hat{\mathbf{s}}_0 \times \frac{\partial \hat{\mathbf{e}}_1}{\partial p_i}, \quad (\text{A.4})$$

$$\frac{\partial a}{\partial p_i} = \frac{\partial b}{\partial p_i} = 0, \quad (\text{A.5})$$

$$\frac{\partial \mathbf{r}}{\partial p_i} = -a \frac{\partial \hat{\mathbf{s}}_0}{\partial p_i} + b \frac{\partial \hat{\mathbf{c}}_0}{\partial p_i}, \quad (\text{A.6})$$

$$\frac{\partial \hat{\mathbf{q}}_1}{\partial p_i} = \hat{\mathbf{q}}_0 \times \frac{\partial \hat{\mathbf{e}}_1}{\partial p_i}. \quad (\text{A.7})$$

Defining  $y = \mathbf{r} \cdot \hat{\mathbf{q}}_1$  and  $x = \mathbf{r} \cdot \hat{\mathbf{q}}_0$  we have:

$$\frac{\partial y}{\partial p_i} = \frac{\partial \mathbf{r}}{\partial p_i} \cdot \hat{\mathbf{q}}_1 + \mathbf{r} \cdot \frac{\partial \hat{\mathbf{q}}_1}{\partial p_i}, \quad (\text{A.8})$$

$$\frac{\partial x}{\partial p_i} = \frac{\partial \mathbf{r}}{\partial p_i} \cdot \hat{\mathbf{q}}_0, \quad (\text{A.9})$$

and finally

$$\frac{\partial \Delta\psi}{\partial p_i} = \frac{x \frac{\partial y}{\partial p_i} - y \frac{\partial x}{\partial p_i}}{x^2 + y^2}. \quad (\text{A.10})$$

## A.2 Partial derivatives with respect to $\lambda$

In the work presented here the wavelength  $\lambda$  is exactly known; however, it may be important to refine the wavelength in XFEL experiments where the incident radiation is from a self-amplified pulse, and is therefore different for each shot. If we wish to refine  $\lambda$  directly as a parameter, then

$$\frac{\partial \mathbf{q}}{\partial \lambda} = \frac{\partial \hat{\mathbf{q}}_0}{\partial \lambda} = \frac{\partial \hat{\mathbf{e}}_1}{\partial \lambda} = \frac{\partial \hat{\mathbf{c}}_0}{\partial \lambda} = 0, \quad (\text{A.11})$$

$$\frac{\partial a}{\partial \lambda} = \frac{q^2}{2}, \quad (\text{A.12})$$

$$\frac{\partial b}{\partial \lambda} = \frac{-a q^2}{b^2}, \quad (\text{A.13})$$

$$\frac{\partial \mathbf{r}}{\partial \lambda} = -\hat{\mathbf{s}}_0 \frac{\partial a}{\partial \lambda} + \hat{\mathbf{c}}_0 \frac{\partial b}{\partial \lambda}, \quad (\text{A.14})$$

$$\frac{\partial \hat{\mathbf{q}}_1}{\partial \lambda} = 0, \quad (\text{A.15})$$

$$\frac{\partial y}{\partial \lambda} = \frac{\partial \mathbf{r}}{\partial \lambda} \cdot \hat{\mathbf{q}}_1, \quad (\text{A.16})$$

$$\frac{\partial x}{\partial \lambda} = \frac{\partial \mathbf{r}}{\partial \lambda} \cdot \hat{\mathbf{q}}_0, \quad (\text{A.17})$$

and finally

$$\frac{\partial \Delta \psi}{\partial \lambda} = \frac{x \frac{\partial y}{\partial \lambda} - y \frac{\partial x}{\partial \lambda}}{x^2 + y^2}. \quad (\text{A.18})$$

## A.3 Partial derivatives with respect to $\mathbf{A}$

Assuming that the reciprocal space orientation matrix  $\mathbf{A}$  is expressed as a function of parameters  $p_j$  with known partial derivatives  $\partial \mathbf{A} / \partial p_j$ , we have:

$$\frac{\partial \mathbf{q}}{\partial p_j} = \frac{\partial \mathbf{A}}{\partial p_j} \mathbf{h}, \quad (\text{A.19})$$

$$\frac{\partial}{\partial p_j} (\mathbf{q} \cdot \mathbf{q}) = \frac{\partial}{\partial p_j} q^2 = 2\mathbf{q} \cdot \frac{\partial \mathbf{q}}{\partial p_j} \quad \text{and} \quad \frac{\partial q}{\partial p_j} = \frac{\mathbf{q} \cdot \frac{\partial \mathbf{q}}{\partial p_j}}{q}, \quad (\text{A.20})$$

$$\frac{\partial \hat{\mathbf{q}}_0}{\partial p_j} = \frac{q \frac{\partial \mathbf{q}}{\partial p_j} - [\mathbf{q} \cdot \frac{\partial \mathbf{q}}{\partial p_j}] \hat{\mathbf{q}}_0}{q^2}, \quad (\text{A.21})$$

$$\frac{\partial \hat{\mathbf{e}}_1}{\partial p_j} = \frac{\partial \hat{\mathbf{q}}_0}{\partial p_j} \times \hat{\mathbf{s}}_0, \quad (\text{A.22})$$

$$\frac{\partial \hat{\mathbf{c}}_0}{\partial p_j} = \hat{\mathbf{s}}_0 \times \frac{\partial \hat{\mathbf{e}}_1}{\partial p_j}, \quad (\text{A.23})$$

$$\frac{\partial a}{\partial p_j} = \lambda \frac{\partial \mathbf{q}}{\partial p_j} \cdot \mathbf{q}, \quad (\text{A.24})$$

$$\frac{\partial b}{\partial p_j} = \frac{2 - q^2 \lambda^2}{2b} \frac{\partial \mathbf{q}}{\partial p_j} \cdot \mathbf{q}, \quad (\text{A.25})$$

$$\frac{\partial \mathbf{r}}{\partial p_j} = -\frac{\partial a}{\partial p_j} \hat{\mathbf{s}}_0 + \frac{\partial b}{\partial p_j} \hat{\mathbf{c}}_0 + b \frac{\partial \hat{\mathbf{c}}_0}{\partial p_j}, \quad (\text{A.26})$$

$$\frac{\partial \hat{\mathbf{q}}_1}{\partial p_j} = \frac{\partial \hat{\mathbf{q}}_0}{\partial p_j} \times \hat{\mathbf{e}}_1 + \hat{\mathbf{q}}_0 \times \frac{\partial \hat{\mathbf{e}}_1}{\partial p_j}, \quad (\text{A.27})$$

$$\frac{\partial y}{\partial p_j} = \frac{\partial \mathbf{r}}{\partial p_j} \cdot \hat{\mathbf{q}}_1 + \mathbf{r} \cdot \frac{\partial \hat{\mathbf{q}}_1}{\partial p_j}, \quad (\text{A.28})$$

$$\frac{\partial x}{\partial p_j} = \frac{\partial \mathbf{r}}{\partial p_j} \cdot \hat{\mathbf{q}}_0 + \mathbf{r} \cdot \frac{\partial \hat{\mathbf{q}}_0}{\partial p_j}, \quad (\text{A.29})$$

and finally

$$\frac{\partial \Delta \psi}{\partial p_j} = \frac{x \frac{\partial y}{\partial p_j} - y \frac{\partial x}{\partial p_j}}{x^2 + y^2}. \quad (\text{A.30})$$

For parameters  $p_j$  that represent pure rotations of the crystal, we have the simplification that  $\frac{\partial \mathbf{q}}{\partial p_j} \cdot \mathbf{q} = 0$  in equations (A.20), (A.21), (A.24) and (A.25).

## Appendix B. Best fit mosaicity $\eta$ and block size $D_{\text{eff}}$ .

Here we present two procedures to compute the optimal effective full-width mosaicity  $\eta$  and spot width  $\alpha$ .

### B.1 Analytical least-squares expression

Optimal parameters  $\alpha$  and  $\eta$  are obtained when the partial derivatives of (19) are zero:

$$\frac{\partial \mathcal{F}}{\partial \alpha} = \frac{\partial \mathcal{F}}{\partial \eta} = 0. \quad (\text{B.1})$$

This leads to a system of normal equations

$$\alpha \sum_{b=1}^N \frac{\langle d \rangle_b^2}{2} + \eta \sum_{b=1}^N \frac{\langle d \rangle_b}{2} = \sum_{b=1}^N \langle d \rangle_b |\Delta \psi|_{\text{max}, b} \quad (\text{B.2})$$

$$\alpha \sum_{b=1}^N \frac{\langle d \rangle_b}{2} + \eta \frac{N}{2} = \sum_{b=1}^N |\Delta \psi|_{\text{max}, b}, \quad (\text{B.3})$$

that can be written in matrix form and directly solved:

$$\begin{pmatrix} \sum_{b=1}^N \frac{\langle d \rangle_b^2}{2} & \sum_{b=1}^N \frac{\langle d \rangle_b}{2} \\ \sum_{b=1}^N \frac{\langle d \rangle_b}{2} & N/2 \end{pmatrix} \begin{pmatrix} \alpha \\ \eta \end{pmatrix} = \begin{pmatrix} \sum_{b=1}^N \langle d \rangle_b |\Delta\psi|_{\max,b} \\ \sum_{b=1}^N |\Delta\psi|_{\max,b} \end{pmatrix}. \quad (\text{B.4})$$

## B.2 Maximum likelihood formalism

The obvious parameters to be optimized are  $\alpha$  and  $\eta$ . However, we wish to enforce positivity constraints to keep the values physically meaningful. In order to avoid special methods to impose parameter bounds, we define the free parameters as the logarithms:

$$\xi_\alpha = \ln(\alpha) \quad \text{and} \quad \xi_\eta = \ln(\eta). \quad (\text{B.5})$$

The requisite partial derivatives are

$$\frac{\partial \Delta\psi_{\text{model}}}{\partial \xi_\alpha} = \frac{d_i \alpha}{2} \quad \text{and} \quad \frac{\partial \Delta\psi_{\text{model}}}{\partial \xi_\eta} = \frac{\eta}{2}. \quad (\text{B.6})$$

For either parameter  $\xi$ , and with  $z$  as defined in (24),

$$\frac{\partial z}{\partial \xi} = \frac{\Delta\psi_i}{(\Delta\psi_{\text{model}})^2} \frac{\partial \Delta\psi_{\text{model}}}{\partial \xi}, \quad (\text{B.7})$$

$$\frac{\partial f}{\partial \xi} = \epsilon \times f \times \frac{\exp(\epsilon(-z+1))}{1 + \exp(\epsilon(-z+1))} \frac{\partial z}{\partial \xi}, \quad (\text{B.8})$$

$$\frac{\partial g}{\partial \xi} = -\epsilon \times g \times \frac{\exp(\epsilon(z+1))}{1 + \exp(\epsilon(z+1))} \frac{\partial z}{\partial \xi}, \quad (\text{B.9})$$

$$\frac{\partial(fg)}{\partial \xi} = f \frac{\partial g}{\partial \xi} + g \frac{\partial f}{\partial \xi}, \quad (\text{B.10})$$

$$\frac{\partial P_i}{\partial \xi} = \frac{1}{2} \frac{\frac{\partial(fg)}{\partial \xi} \Delta\psi_{\text{model}} - fg \frac{\partial \Delta\psi_{\text{model}}}{\partial \xi}}{(\Delta\psi_{\text{model}})^2}. \quad (\text{B.11})$$

Now returning to the full posterior probability expression (20), we can determine the parameters  $\alpha$  and  $\eta$  by minimizing the target function

$$\mathcal{G} = - \sum_{i=1}^{\text{Nobs}} \ln P_i, \quad (\text{B.12})$$

where the sum is over all observations  $i$ . For iterative parameter optimization we utilize the partial derivatives

$$\frac{\partial \mathcal{G}}{\partial \xi} = - \sum_{i=1}^{\text{Nobs}} \frac{1}{P_i} \frac{\partial P_i}{\partial \xi}. \quad (\text{B.13})$$

A few practical details bear on the of implementation of this procedure. Care must be taken to avoid misindexing; a single Bragg spot assigned the wrong Miller index may be taken to have an erroneously large  $\Delta\psi_i$  magnitude, biasing the mosaicity and domain size estimates. Conversely, parameters that produce a

too-large  $\Delta\psi_{\text{model}}$  envelope predict too many Bragg spots, leading to spot overlap and misindexing. Therefore, when initial values are assigned for maximum likelihood refinement (by using the analytical least-squares expression) we insist that the estimated domain size exceeds some minimum value. We choose a physically reasonable minimum of 10 unit cells for the edge of a domain ( $D_{\text{eff}} \geq 10 \times \sqrt[3]{\text{unit cell volume}}$ ).

Another concern is that the exponential expressions in (24), (B.8), and (B.9) are susceptible to arithmetic overflow if the argument is too large; the arguments must therefore be tested prior to each exponential execution.
